# Supplementary material
Source: PubMed Central journal article supplement (PMC514943)
Supplement: 7600279s1.pdf [file 7600279s1.pdf]

Supplementary Figure 1

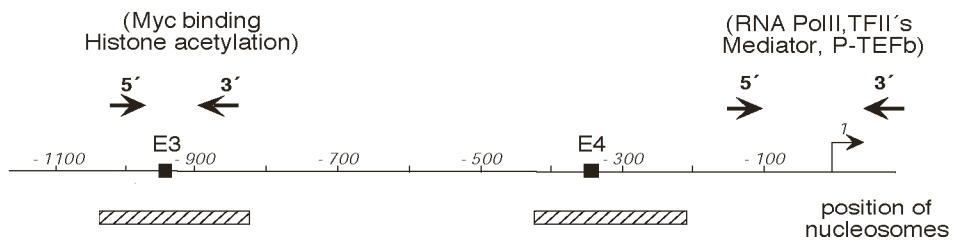

Figure 1: Schematic representation of the mouse *cyclin D2* locus from -1100bp to the transcriptional start site (+1).

The two E-boxes (E3 and E4), the primer pairs and the position of nucleosomes are depicted by black boxes, arrows and hatched bars, respectively. The primers used for the analysis of the rat *cyclin D2* promoter are localized in homologous regions to the mouse locus.
