# Supplementary material
Source: PubMed Central journal article supplement (PMC514943)
Supplement: 7600279s2.pdf [file 7600279s2.pdf]

## Supplementary Figure 2

**A.**

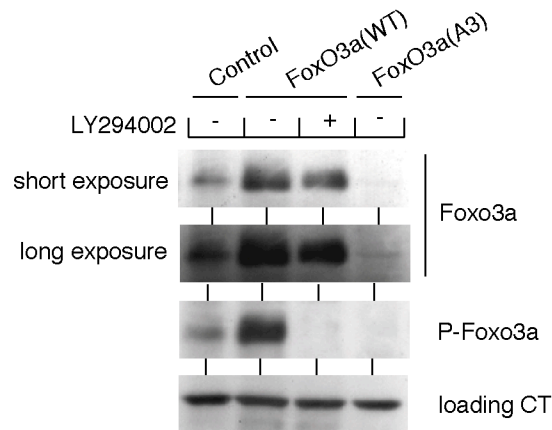

**B.**

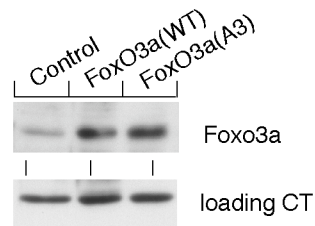

Figure 2: Expression levels and phosphorylation status of FoxO3a(WT) and FoxO3a(A3) in infected mouse MycER fibroblasts.

A. Shown are immunoblots documenting the expression of FoxO3a (upper panels) or of phosphorylated FoxO3a (lower panel) in exponentially growing pools of control-, FoxO3a(WT)- and FoxO3a(A3)-infected mouse MycER cells in presence or in absence of LY294002. The total amount of FoxO3a(A3) protein in all clones surviving selection was very low, in contrast to cells expressing FoxO3a, despite comparable expression of the retroviral mRNA, suggesting that there is considerable selection against FoxO3a.

B. To rule out problems with the FoxO3a(A3) virus, we compared expression levels from both this and the wild-type FoxO3a virus shortly after infection in primary MEFs: shown are immunoblots of total lysates prepared from MEFs harvested at 2 days after infection and puromycin selection.
