# Supplementary material
Source: PubMed Central journal article supplement (PMC514943)
Supplement: 7600279s3.pdf [file 7600279s3.pdf]

### Supplementary Figure 3

**A.**

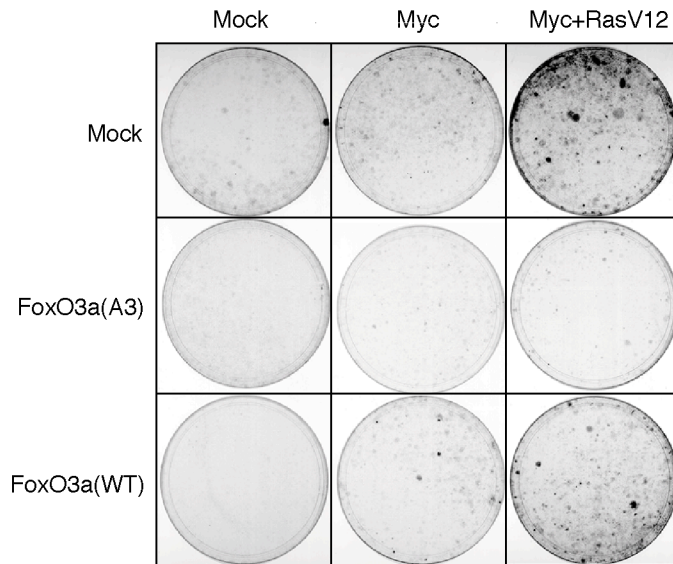

**B.**

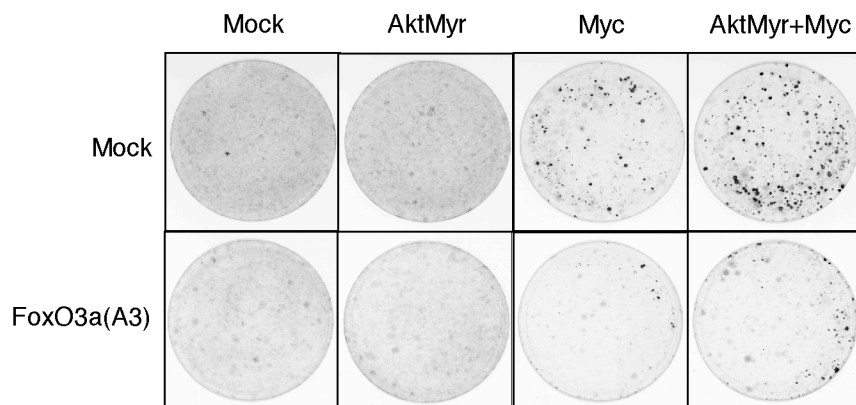

Figure 3: Foci formation of primary mouse embryo fibroblasts (MEFs) is unimpaired by wild type FoxO3a, but inhibited by FoxO3a(A3).

A. Primary wild-type MEFs were infected sequentially with retroviruses encoding Myc, or Myc and RasV12, and either pBabePuro-FoxO3a, pBabePuroFoxO3a(A3) or empty pBabePuro. Two days after the last infection MEFs were selected with puromycin and cells were allowed to grow for two weeks prior to crystal violet staining.

B. The experiment was performed as in A, except that retroviruses encoding activated allele of Akt (AktMyr) was used instead of Ras.
