# Supplementary material
Source: PubMed Central journal article supplement (PMC514943)
Supplement: 7600279s4.pdf [file 7600279s4.pdf]

#### Supplementary Figure 4

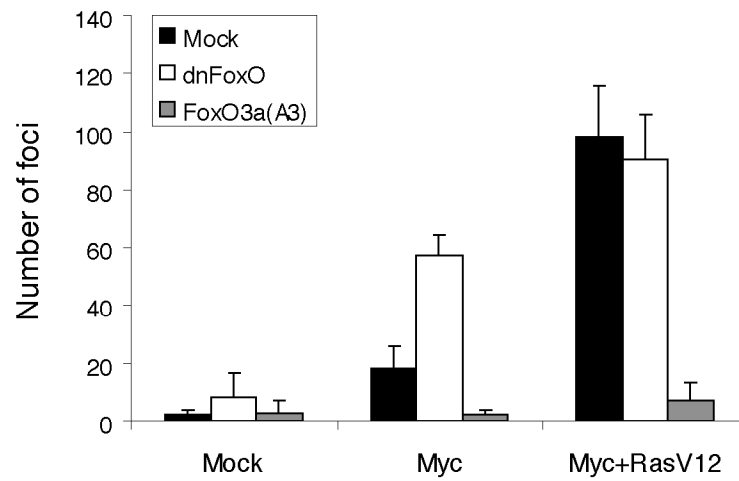

Figure 4: Myc/RasV12 collaboration in focus formation of primary MEFs is inhibited by FoxO3a(A3), while dominant negative FoxO (dnFoxO) co-operates with Myc in the absence of oncogenic Ras in focus formation.

The experiment was performed as described in the legend to Figure 6. Shown is a quantitation of the results obtained. Foci were counted in 3 independent experiments.
